# Supplementary material for: Curcumin exerts a protective effect against premature ovarian failure in mice
Source: PubMed Central journal article supplement (PMC5863768; doi:10.1530/jme-17-0214), 2018-02-07
Supplement: jme-60-261-t001.pdf [file jme-60-261-t001.pdf]

**Supplementary information for:**

**Curcumin exerts a Protective Effect against Premature Ovarian Failure in Mice**

Zhengjie Yan<sup>a,b</sup>, Youjin Dai<sup>c</sup>, Heling Fu<sup>c</sup>, Yuan Zheng<sup>c</sup>, Dan Bao<sup>c</sup>, Yuan Yin<sup>c</sup>, Qin Chen<sup>c</sup>, Xiaowei Nei<sup>d</sup>, Qingting Hao<sup>c</sup>, Yugui Cui<sup>b\*</sup>, Daorong Hou<sup>c\*</sup>

<sup>a</sup>College of Animal Science and Technology, Yangzhou University, 12 Wenhui East Road, Yangzhou, 225009, People's Republic of China

<sup>b</sup>State Key Laboratory of Reproductive Medicine, Center of Clinical Reproductive Medicine, The First Affiliated Hospital of Nanjing Medical University, 300 Guangzhou Road, Nanjing, 210029, People's Republic of China

<sup>c</sup>Animal Core Facility of Nanjing Medical University, Nanjing Medical University, 101 Longmian Avenue, Nanjing, 211166, People's Republic of China

<sup>d</sup>Department of Reproductive Medicine, Affiliated Hospital of Nanjing University of Traditional Chinese Medicine, 155 Hanzhong Road, Nanjing 210029, China.

\*Correspondence and requests for materials should be addressed to Dr. Daorong Hou ([houdaorong@njmu.edu.cn](mailto:houdaorong@njmu.edu.cn)) or Prof. Yugui Cui ([cuiygnj@njmu.edu.cn](mailto:cuiygnj@njmu.edu.cn)).

**Supplementary Table 1. List of primers and condition for Q-PCR.**

| Genes        | Primer sequence (5'-3')         | Accession Number | Products size (bp) | Annealing Temperature (°C) |
|--------------|---------------------------------|------------------|--------------------|----------------------------|
| <i>Amh</i>   | 5'-TCCTACATCTGGCTGAAGTGATATG-3' | NM_00744         | 166                | 58                         |
|              | 5'-CAGGTGGAGGCTCTTGGAAGT-3'     | 5.2              |                    |                            |
| <i>Cat</i>   | 5'-GGTGCGGACATTCTACACAAAG-3'    | NM_00980         | 162                | 52                         |
|              | 5'-TGTTCTCACACAGGCGTTTCC-3'     | 4.2              |                    |                            |
| <i>Sod2</i>  | 5'-GTGAACAATCTCAACGCCA-3'       | NM_01367         | 189                | 51                         |
|              | 5'-GATAGCCTCCAGCAACTCT-3'       | 1.3              |                    |                            |
| <i>Gapdh</i> | 5'-CTATTGGCAACGAGCGGTTCC-3'     | DQ403054.        | 152                | 55                         |
|              | CAGCACTGTGTTGGCATAGAGG          | 1                |                    |                            |
